# Supplementary material for: Feedback Modulates Audio-Visual Spatial Recalibration
Source: PubMed Central journal article supplement (PMC6979315; doi:10.3389/fnint.2019.00074), 2020-01-17
Supplement: Table_1.pdf [file Table_1.pdf]

**Supplementary Table 1. Total number of participants for each combination of sound frequency of the adapted sound, FB modality and visual reliability.**

|                                      |         | Audition FB Modality |                     | Vision FB Modality |                     |
|--------------------------------------|---------|----------------------|---------------------|--------------------|---------------------|
|                                      |         | Visual Rel.<br>low   | Visual Rel.<br>high | Visual Rel.<br>low | Visual Rel.<br>high |
| <b>Sound Frequency Adapted Sound</b> | 250 Hz  | 5                    | 5                   | 5                  | 3                   |
|                                      | 500 Hz  | 4                    | 4                   | 6                  | 4                   |
|                                      | 1000 Hz | 5                    | 5                   | 3                  | 5                   |
|                                      | 2000 Hz | 4                    | 4                   | 4                  | 6                   |
