# Supplementary material for: Feedback Modulates Audio-Visual Spatial Recalibration
Source: PubMed Central journal article supplement (PMC6979315; doi:10.3389/fnint.2019.00074), 2020-01-17
Supplement: Table_2.pdf [file Table_2.pdf]

**Supplementary Table 2. Total number of participants for each combination of session number, FB modality and visual reliability.** The session numbers reflect the temporal order of sessions for each participant.

|                       |   | <b>Audition FB Modality</b> |                     | <b>Vision FB Modality</b> |                     |
|-----------------------|---|-----------------------------|---------------------|---------------------------|---------------------|
|                       |   | Visual Rel.<br>low          | Visual Rel.<br>high | Visual Rel.<br>low        | Visual Rel.<br>high |
| <b>Session Number</b> | 1 | 5                           | 4                   | 4                         | 5                   |
|                       | 2 | 3                           | 5                   | 5                         | 5                   |
|                       | 3 | 5                           | 5                   | 4                         | 4                   |
|                       | 4 | 5                           | 4                   | 5                         | 4                   |
