# Supplementary material for: Feedback Modulates Audio-Visual Spatial Recalibration
Source: PubMed Central journal article supplement (PMC6979315; doi:10.3389/fnint.2019.00074), 2020-01-17
Supplement: Table_3.pdf [file Table_3.pdf]

**Supplementary Table 3. Total number of participants for each combination of audio-visual discrepancy, FB modality and visual reliability.**

|                                 |        | <b>Audition FB Modality</b> |                     | <b>Vision FB Modality</b> |                     |
|---------------------------------|--------|-----------------------------|---------------------|---------------------------|---------------------|
|                                 |        | Visual Rel.<br>low          | Visual Rel.<br>high | Visual Rel.<br>low        | Visual Rel.<br>high |
| <b>Audio-visual Discrepancy</b> | 13.5°  | 5                           | 5                   | 5                         | 3                   |
|                                 | -13.5° | 4                           | 4                   | 6                         | 4                   |
